# Supplementary material for: Periodic DFT calculations to compute the attributes of a quantum material: honeycomb ruthenium trichloride
Source: Royal Society of Chemistry journal article supplement (doi:10.1039/d4cp01383b), 2024-01-01
Supplement: d4cp01383b1.pdf [file d4cp01383b1.pdf]

## Periodic DFT Calculations to Compute the Attributes of a Quantum Material: Honeycomb Ruthenium Trichloride – Supporting Information

Ashlyn M. Koval<sup>a,b</sup>, Glen R. Jenness<sup>c</sup>, Timothy C. Schutt<sup>c</sup>, Gilbert K. Kosgei<sup>c</sup>, P.U. Ashvin I. Fernando<sup>b</sup>, and Manoj K. Shukla<sup>c</sup>

<sup>a</sup>*Oak Ridge Institute for Science and Education (ORISE), Oak Ridge, Tennessee 37830 United States*

<sup>b</sup>*Current affiliation: Simetri, Inc., 7005 University Blvd, Winter Park, Florida 32792, United States*

<sup>c</sup>*Environmental Laboratory, US Army Engineer Research and Development Center, 3909 Halls Ferry Road, Vicksburg, Mississippi 39180, United States*

\*Corresponding authors; Email: [timothy.c.schutt@usace.army.mil](mailto:timothy.c.schutt@usace.army.mil); [manoj.k.shukla@usace.army.mil](mailto:manoj.k.shukla@usace.army.mil)

### Table of Contents

|                                                    |          |
|----------------------------------------------------|----------|
| <b>EXPERIMENTAL UV-VIS SPECTRA .....</b>           | <b>3</b> |
| <b>LATTICE PARAMETER CONVERGENCE .....</b>         | <b>4</b> |
| NON-GAMMA SHIFTED GRID .....                       | 4        |
| GAMMA-SHIFTED GRID .....                           | 4        |
| <b>BANDGAP CONVERGENCE VS K-POINT DENSITY.....</b> | <b>5</b> |
| <b>CHEMICAL POTENTIAL VS K-POINT DENSITY .....</b> | <b>6</b> |
| <b>RELATIVE ENERGY OF THE AFM STATES .....</b>     | <b>7</b> |
| REC3D WITH PLANE WAVES .....                       | 7        |
| RHOMMONO WITH DIFFERING RUTHENIUM VALENCY .....    | 7        |

## Experimental UV-Vis Spectra

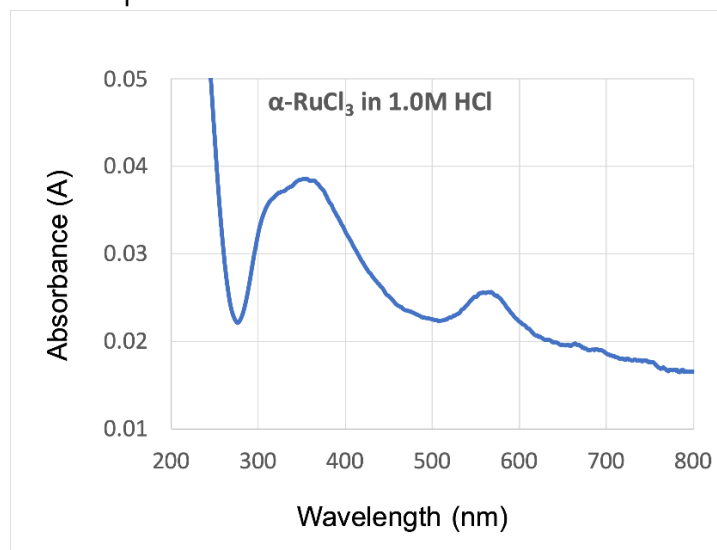

Figure S1. The UV-Vis absorption spectrum of  $\alpha\text{-RuCl}_3$  was obtained using a freshly prepared solution in 1.0M HCl.

## Lattice Parameter Convergence

### Non-Gamma Shifted Grid

Table S1. Lattice parameters (Å) computed with respect to k-point density & Hubbard correction (U) using a non-gamma-shifted grid for the ferromagnetic spin state of Rec3D. Calculations completed using optPBE-vdW and plane waves cut off (600 eV). When the k-point density was varied (left side of the table) the U was kept at a static value of 2.5 eV and when the U was varied (right side of the table) the k-point density was kept at a static value of 3.0 points per Å<sup>-1</sup>.

| k-point Density<br>(points per Å <sup>-1</sup> ) | k-point<br>Grid | a (Å) | b (Å) | c (Å) | Hubbard<br>Correction<br>(eV) | a (Å) | b (Å) | c (Å) |
|--------------------------------------------------|-----------------|-------|-------|-------|-------------------------------|-------|-------|-------|
| <b>2.0</b>                                       | 3 × 2 × 1       | 16.91 | 10.59 | 6.13  | <b>1.5</b>                    | 16.89 | 10.52 | 6.11  |
| <b>3.0</b>                                       | 4 × 2 × 2       | 16.90 | 10.59 | 6.13  | <b>2.5</b>                    | 16.90 | 10.59 | 6.13  |
| <b>4.0</b>                                       | 5 × 3 × 2       | 16.90 | 10.59 | 6.13  | <b>3.5</b>                    | 16.80 | 10.61 | 6.14  |

\*from neutron scattering<sup>70</sup> α-RuCl<sub>3</sub> lattice is: a = 17.05 b = 10.32 c = 5.96

### Gamma-Shifted Grid

Table S2. Lattice parameters (Å) computed with respect to k-point density using a gamma-shifted grid for the ferromagnetic spin state of Rec3D. Calculations completed using optPBE-vdW and plane waves cut off (600 eV). When the k-point density was varied the U was kept at a static value of 2.5 eV.

| k-point Density<br>(points per Å <sup>-1</sup> ) | k-point<br>Grid | a (Å) | b (Å) | c (Å) |
|--------------------------------------------------|-----------------|-------|-------|-------|
| 2.0                                              | 3 × 2 × 1       | 16.90 | 10.59 | 6.13  |
| 3.0                                              | 4 × 2 × 2       | 16.91 | 10.59 | 6.13  |
| 4.0                                              | 5 × 3 × 2       | 16.90 | 10.59 | 6.13  |

\*from neutron scattering<sup>70</sup> α-RuCl<sub>3</sub> lattice is: a = 17.05 b = 10.32 c = 5.96

## Bandgap Convergence vs k-point Density

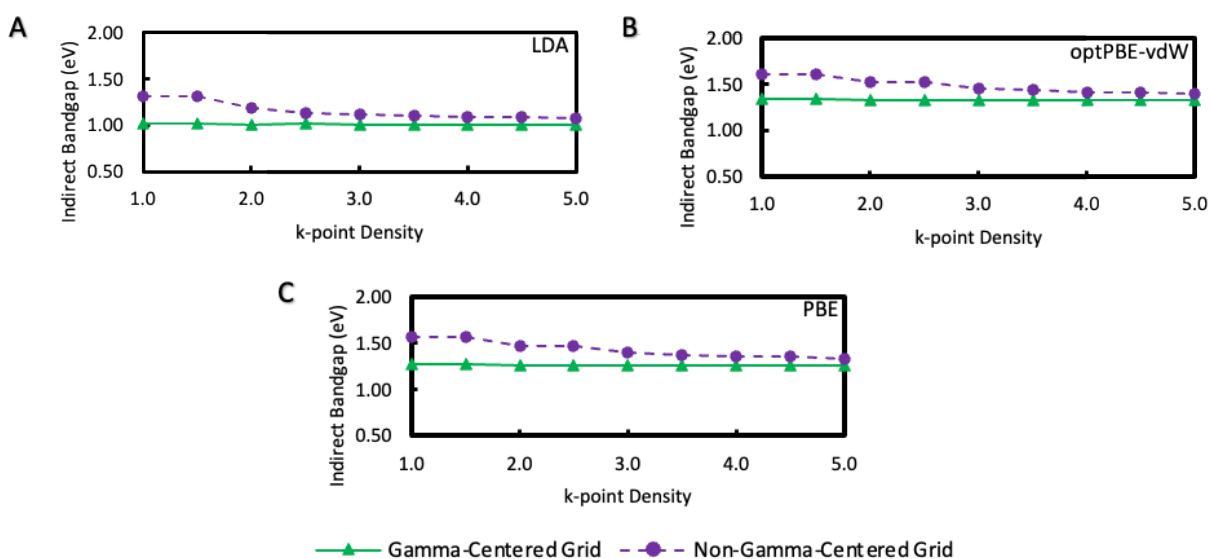

Figure S2. Band gap ( $E_g$ ) convergence for the ferromagnetic spin state of Rec3D. Solid greenline is computed using a gamma-centered grid. Dashed blue line is computed using a non-gamma centered grid. A)  $E_g$  convergence with respect to k-point density computed using LDA & finite difference. B)  $E_g$  convergence with respect to k-point density computed using optPBE-vdW & finite difference. C)  $E_g$  convergence with respect to k-point density computed using PBE & finite difference.

Initial observations of the data presented in Figure S2 determined that when the grid was not specified to be gamma-centered the  $E_g$  started high at low k-point density before slowly decreasing towards higher k-point densities. Applying linear regression gives a slope of -0.0667 eV, -0.0616 eV, and -0.0642 eV for LDA, optPBE-vdW, and PBE, respectively. On the other hand, the gamma-centered grid specification results in a much more linear trend with linear regression slopes of -0.0042 eV, -0.0027 eV, and -0.0027 for LDA, optPBE-vdW, and PBE, respectively. This indicates that the gamma-centered grid is much faster to converge with respect to k-point density and that we do not need to consider large k-densities to achieve convergence. In fact, if we neglect to include the k-point densities of 1.0 points per  $\text{\AA}^{-1}$  and 1.5 points per  $\text{\AA}^{-1}$  the slope of the trend line for the data from 2.0 points per  $\text{\AA}^{-1}$  to 5.0 points per  $\text{\AA}^{-1}$  is only -0.0002 eV and -0.0006 eV for optPBE-vdW and PBE, respectively. In the case of LDA we see the exclusion of these data points only causes the slope to decrease to -0.0025 which is roughly half of the original slope. This indicates that LDA is reaching convergence with respect to k-point density more slowly than the other two functionals. It should also be noted that LDA underestimates the predicted  $E_g$  to be much lower (avg.  $1.01 \pm 0.06$  eV) than either optPBE-vdW (avg.  $1.33 \pm 0.01$  eV) or PBE (avg.  $1.26 \pm 0.01$  eV).

## Chemical Potential vs k-point Density

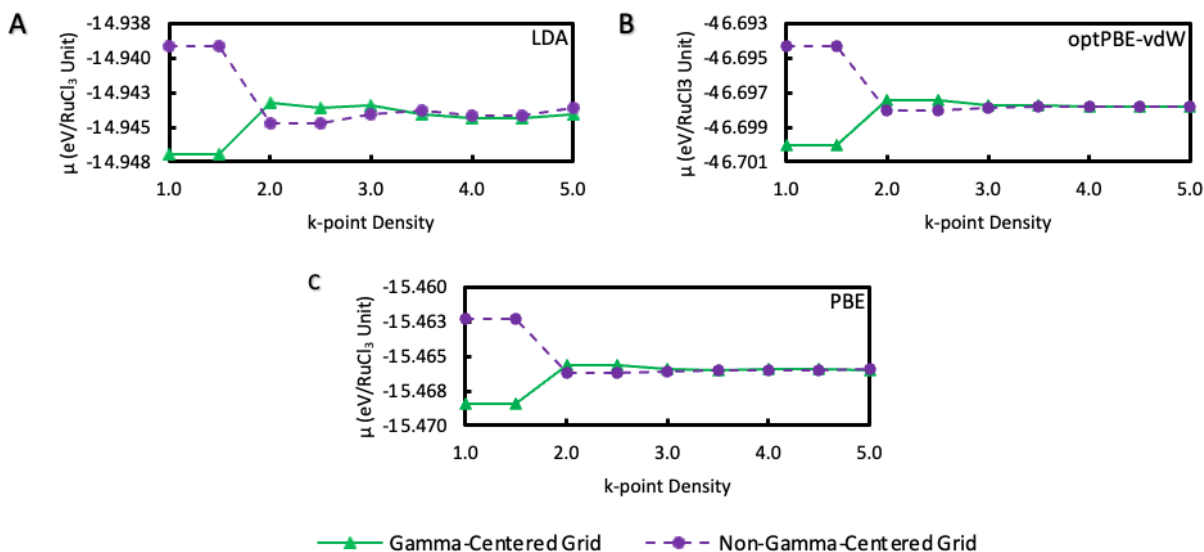

Figure S3. Chemical potential convergence for the ferromagnetic state of Rec3D. Solid greenline is computed using a gamma-centered grid. Dashed blue line is computed using a non-gamma centered grid. A) Chemical potential ( $\mu$ ) convergence with respect to k-point density computed using LDA & finite difference. B) Convergence of  $\mu$  with respect to k-point density computed using optPBE-vdW & finite difference. C) Convergence of  $\mu$  with respect to k-point density computed using PBE & finite difference.

The  $\mu$  presented in Figure S3 with respect to k-point density has a different starting point depending on whether a gamma-centered grid is specified or a gamma-centered grid is not specified. At low k-point densities (1.0 — 1.5 points per  $\text{\AA}^{-1}$ ) the  $\mu$  for the non-gamma shifted grid is higher in energy than the gamma-shifted grid. Then between k-point densities of 2.0 — 3.0 points per  $\text{\AA}^{-1}$  this trend flips so that the gamma-shifted grid is higher in energy than the non-gamma shifted grid. The LDA functional (Figure S3A) in particular starting from a k-point density of 3.0 points per  $\text{\AA}^{-1}$  and up continues to fluctuate rather than converging to a specific value. It is possible that a higher k-point density might be necessary in order to reach convergence with the use of the LDA functional. Nevertheless, in the case of both the PBE and optPBE-vdW functionals (Figure 5A & Figure 5B) we see that both the gamma-shifted and non-gamma grids appear to reach convergence around a k-point density of 3.0 points per  $\text{\AA}^{-1}$ . This information combined with the previous analysis of  $E_g$  convergence in Section 3.1.2, and the lack of sensitivity of lattice to k-point density indicates that a k-point density of 3.0 points per  $\text{\AA}^{-1}$  should be a sufficient compromise on convergence and computational time. It can also be evaluated that the PBE and optPBE-vdW functionals are more appropriate as they calculate  $E_g$  closest to experimentally determined values and also reach convergence of thus far calculated properties.

## Relative Energy of the AFM States

### Rec3D with Plane Waves

Table S3. Relative energy of the AFM spin states to the ferromagnetic spin state (meV) using a gamma-shifted grid. Calculations completed using optPBE-vdW, U of 1.5 eV, and k-point density of 3.0 points per  $\text{\AA}^{-1}$ .

| Structure<br>Method<br>Basis Set | Rec3D<br>(3 layers) |               | optPBE-vdW<br>PW 600 |
|----------------------------------|---------------------|---------------|----------------------|
|                                  | PW 400              | PBE<br>PW 600 |                      |
| FM                               | 0                   | 0             | 0                    |
| AFM-ZZ                           | 133                 | 132           | 221                  |
| AFM-ST                           | 136                 | 136           | 228                  |
| AFM-NE                           | 67                  | 67            | 75                   |

### RhomMono with Differing Ruthenium Valency

Table S4. Relative energy of the AFM spin states to the ferromagnetic spin state (meV). Calculations completed using optPBE-vdW and k-point density of 3.0 points per  $\text{\AA}^{-1}$ .

| Ru <sup>3+</sup> Valency<br>U (eV) | 16 e <sup>-</sup> |      |      |      |      | 8 e <sup>-</sup> |      |       |       |       |
|------------------------------------|-------------------|------|------|------|------|------------------|------|-------|-------|-------|
|                                    | 1.5               | 2.0  | 2.5  | 3.0  | 3.5  | 1.5              | 2.0  | 2.5   | 3.0   | 3.5   |
| FM                                 | 0                 | 0    | 0    | 0    | 0    | 0                | 0    | 0     | 0     | 0     |
| AFM-ZZ                             | 6.0               | 5.7  | 3.0  | 2.4  | 3.7  | -0.55            | 1.87 | -1.84 | 2.83  | -0.88 |
| AFM-ST                             | 1.5               | -1.2 | -3.9 | -1.6 | -1.4 | 2.19             | 3.27 | -2.23 | -1.57 | -0.02 |
| AFM-NE                             | 9.2               | 5.6  | 2.2  | 2.2  | 1.6  | 9.57             | 5.00 | 2.19  | 2.62  | 2.61  |
